# Supplementary material for: Modulation of plasma complement by the initial dose of epirubicin/docetaxel therapy in breast cancer and its predictive value
Source: PubMed Central journal article supplement (PMC2967072; doi:10.1038/sj.bjc.6605909), 2010-09-28
Supplement: 6605909x1.pdf [file 6605909x1.pdf]

**Influence of chemotherapy**

**Discovery set (n=12)**

| Spot-ID | before initial dose |       | after initial dose  |       | paired t-test <sup>(1)</sup> |
|---------|---------------------|-------|---------------------|-------|------------------------------|
|         | mean <sup>(2)</sup> | SD    | mean <sup>(2)</sup> | SD    | p-value                      |
| 195     | 0,891               | 0,183 | 1,155               | 0,230 | 0,033                        |
| 235     | 1,075               | 0,201 | 0,807               | 0,170 | < 0.01                       |
| 239     | 1,112               | 0,270 | 0,797               | 0,226 | < 0.01                       |
| 242     | 1,113               | 0,301 | 0,764               | 0,247 | < 0.001                      |
| 248     | 1,142               | 0,305 | 0,806               | 0,248 | < 0.01                       |
| 257     | 1,159               | 0,309 | 0,815               | 0,237 | < 0.01                       |
| 258     | 1,125               | 0,311 | 0,823               | 0,253 | < 0.01                       |
| 388     | 0,844               | 0,172 | 1,134               | 0,299 | < 0.01                       |
| 393     | 0,813               | 0,172 | 1,184               | 0,362 | 0,014                        |
| 397     | 0,818               | 0,206 | 1,220               | 0,359 | < 0.01                       |
| 405     | 0,834               | 0,257 | 1,201               | 0,376 | < 0.01                       |
| 406     | 0,852               | 0,270 | 1,181               | 0,370 | < 0.01                       |
| 407     | 0,893               | 0,305 | 1,146               | 0,383 | < 0.01                       |
| 536     | 0,927               | 0,230 | 1,291               | 0,542 | 0,028                        |
| 561     | 0,992               | 0,379 | 1,307               | 0,503 | 0,018                        |
| 562     | 0,907               | 0,273 | 1,244               | 0,424 | < 0.01                       |
| 576     | 0,887               | 0,242 | 1,192               | 0,431 | 0,018                        |
| 577     | 0,833               | 0,220 | 1,216               | 0,518 | < 0.01                       |
| 696     | 0,896               | 0,146 | 1,203               | 0,232 | < 0.01                       |
| 929     | 0,848               | 0,253 | 1,070               | 0,275 | 0,012                        |
| 972     | 0,847               | 0,166 | 1,371               | 0,524 | < 0.01                       |
| 1064    | 1,037               | 0,306 | 1,376               | 0,456 | < 0.01                       |
| 1075    | 1,031               | 0,301 | 1,413               | 0,527 | < 0.01                       |
| 1088    | 1,183               | 0,511 | 0,858               | 0,401 | < 0.01                       |
| 1100    | 1,262               | 0,625 | 0,892               | 0,509 | < 0.01                       |
| 1120    | 1,276               | 0,607 | 0,841               | 0,527 | < 0.01                       |
| 1132    | 1,249               | 0,613 | 0,775               | 0,521 | < 0.01                       |
| 1133    | 1,209               | 0,660 | 0,682               | 0,536 | < 0.01                       |
| 1136    | 1,300               | 0,680 | 0,927               | 0,576 | < 0.01                       |
| 1160    | 1,156               | 0,994 | 0,583               | 0,428 | < 0.01                       |
| 1162    | 1,209               | 0,956 | 0,571               | 0,338 | < 0.01                       |
| 1335    | 0,814               | 0,311 | 1,051               | 0,341 | 0,020                        |
| 1340    | 0,807               | 0,288 | 1,047               | 0,370 | 0,014                        |

<sup>(1)</sup> The paired t-test was corrected for multiple testing using the false discovery rate algorithm according to Benjamini and Hochberg (1995)

<sup>(2)</sup> Standardized abundance

Michlmayr et al.; Supplementary Data, S2

| Spot ID | Protein name                                   | Acc. no. | PMF                                          | MS/MS                         |                                                    |
|---------|------------------------------------------------|----------|----------------------------------------------|-------------------------------|----------------------------------------------------|
|         |                                                |          | Seq.cov. %                                   | Peptides                      | sequence                                           |
| 393-407 | Inter- $\alpha$ -trypsin inhibitor heavy chain | P19823   | 9 (MASCOT, ProFound)<br>13 (Aldente)         | 1468.74<br>1337.65            | AHVSFKPTVAQQR<br>FYNQVSTPLLR                       |
|         | Inter- $\alpha$ -trypsin inhibitor light chain | P02760   | 13 (MASCOT)<br>31 (ProFound)<br>22 (Aldente) | 1682,79                       | TVAAC(CAM)NLPV-<br>RGPC(CAM)R                      |
| 536     | Complement component C3b                       | P01024   | 39 (MASCOT)<br>21 (ProFound)<br>20 (Aldente) | n.i.                          |                                                    |
| 561     | Complement component C4                        | P0C0L4   | n.i.                                         | 983,79                        | QGSFQGGFR                                          |
| 562     | Complement component C4                        | P0C0L4   | 19 (MASCOT)<br>27 (ProFound)<br>18 (Aldente) | n.i.                          |                                                    |
| 576     | Complement component C4                        | P0C0L4   | 12 (Aldente)                                 | n.i.                          |                                                    |
| 577     | Complement component C4                        | P0C0L4   | 9 (ProFound)<br>12 (Aldente)                 | n.i.                          |                                                    |
| 696     | Complement C1r precursor                       | P00736   | 13 (MASCOT)<br>16 (ProFound)<br>14 (Aldente) | n.i.                          |                                                    |
| 972     | L-plastin                                      | P13796   | 28 (AMSCOT)<br>26 (ProFound)<br>18 (Aldente) | 1676.05<br>1576.93<br>1584.93 | FSLVGIGGQDLNEGNR<br>WANYHLENAGCNK<br>VYALPEDLVEVNP |
| 1064    | $\alpha$ -1-antichymotrypsin                   | P01011   | 10 (Mascot)                                  |                               |                                                    |
| 1120    | $\alpha$ -2-HS-glycoprotein                    | P02765   | 8 (MASCOT)<br>9 (ProFound)                   |                               |                                                    |
| 1340    | Complement component C4                        | P0C0L4   | 6 (MASCOT)<br>6 (ProFound)<br>55 (Aldente)   | 972.55<br>1191.67             | DKGOAGLQR<br>LGQYASPTAKR                           |
